# Supplementary material for: High-Throughput Quantitative Screening of Glucose-Stimulated Insulin Secretion and Insulin Content Using Automated MALDI-TOF Mass Spectrometry
Source: MDPI journal article supplement (doi:10.3390/cells12060849), 2023-03-09
Supplement: s1 [file s1]

## Supplementary Data

**Table S1.** List of siRNA used for Min6 cells transfection

| Target Gene   | Species | Product name                         | Product Reference                    | Provider  | Sequence             |
|---------------|---------|--------------------------------------|--------------------------------------|-----------|----------------------|
| siRNA Control | Mouse   | ON-TARGETplus Non-targeting Pool     | D-001810-10-20                       | Dharmacon | UGGUUUACAUGUCGACUAA  |
|               |         |                                      |                                      |           | UGGUUUACAUGUUGUGUGA  |
|               |         |                                      |                                      |           | UGGUUUACAUGUUUUCUGA  |
|               |         |                                      |                                      |           | UGGUUUACAUGUUUCCUA   |
| siKcnj11      | Mouse   | ON-TARGETplus SMARTpool siRNA Kcnj11 | L-042183-00-0005, 16514, J-042183-05 | Dharmacon | GAGAAUGGCGUGGGUGGUA  |
|               |         |                                      | L-042183-00-0005, 16514, J-042183-06 |           | CAUUAUCCCUGAGGAAUUAU |
|               |         |                                      | L-042183-00-0005, 16514, J-042183-07 |           | GCUAUUCUGUGGACUACUC  |
|               |         |                                      | L-042183-00-0005, 16514, J-042183-08 |           | CUACCUAGCUGACGAGAUU  |
| siPdx1        | Mouse   | ON-TARGETplus SMARTpool siRNA Pdx1   | L-040402-01-0005, 18609, J-040402-09 | Dharmacon | CUUCUGAUGCCAAGCGAAU  |
|               |         |                                      | L-040402-01-0005, 18609, J-040402-10 |           | GAGCAAGAUUGUGCGGUGA  |
|               |         |                                      | L-040402-01-0005, 18609, J-040402-11 |           | AAGAAACGUAGUAGCGGGA  |
|               |         |                                      | L-040402-01-0005, 18609, J-040402-12 |           | GGUACAAACUUGAGCGUUC  |

**Table S2. List of oligonucleotides used in qPCR experiments**

| Official symbol | Species | Sequence             | Forward / Reverse |
|-----------------|---------|----------------------|-------------------|
| CYPA (Cyclo)    | Mouse   | ATGGCACTGGCGGCAGGTCC | Forward           |
|                 |         | TTGCCATTCTGGACCCAAA  | Reverse           |
| Pdx1            | Mouse   | ATTGTGCGGTGACCTCGGGC | Forward           |
|                 |         | GATGCTGGAGGGCTGTGGCG | Reverse           |

**Delannoy et al. Figure S1**

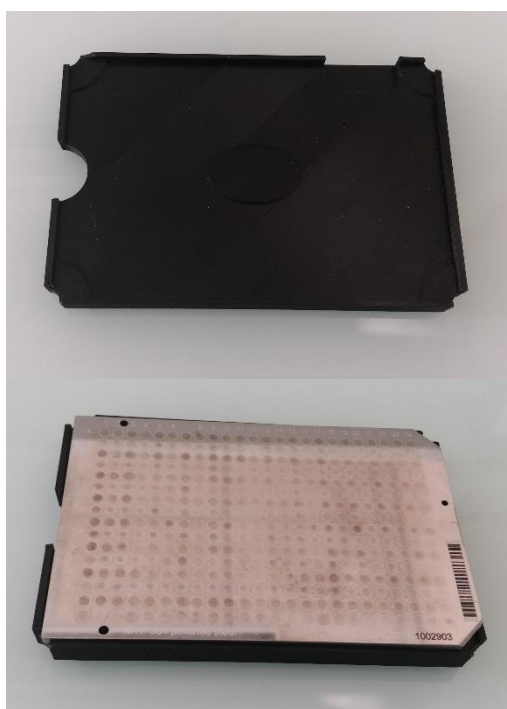

**Figure S1: 3D Printing adapter to allow the use of the MALDI target by Biomek NX<sup>P</sup> liquid handler**

Delannoy et al. Figure S2

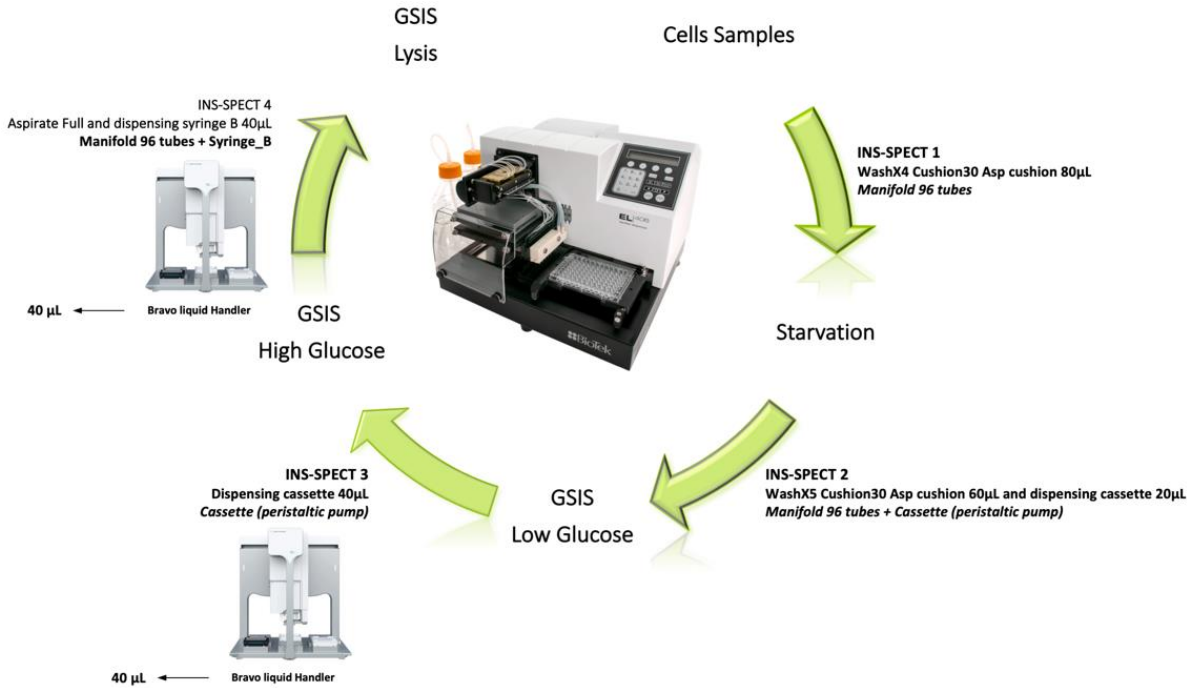

Figure S2: Schematic Representation of the GSIS pipeline.

Delannoy et al. Figure S3

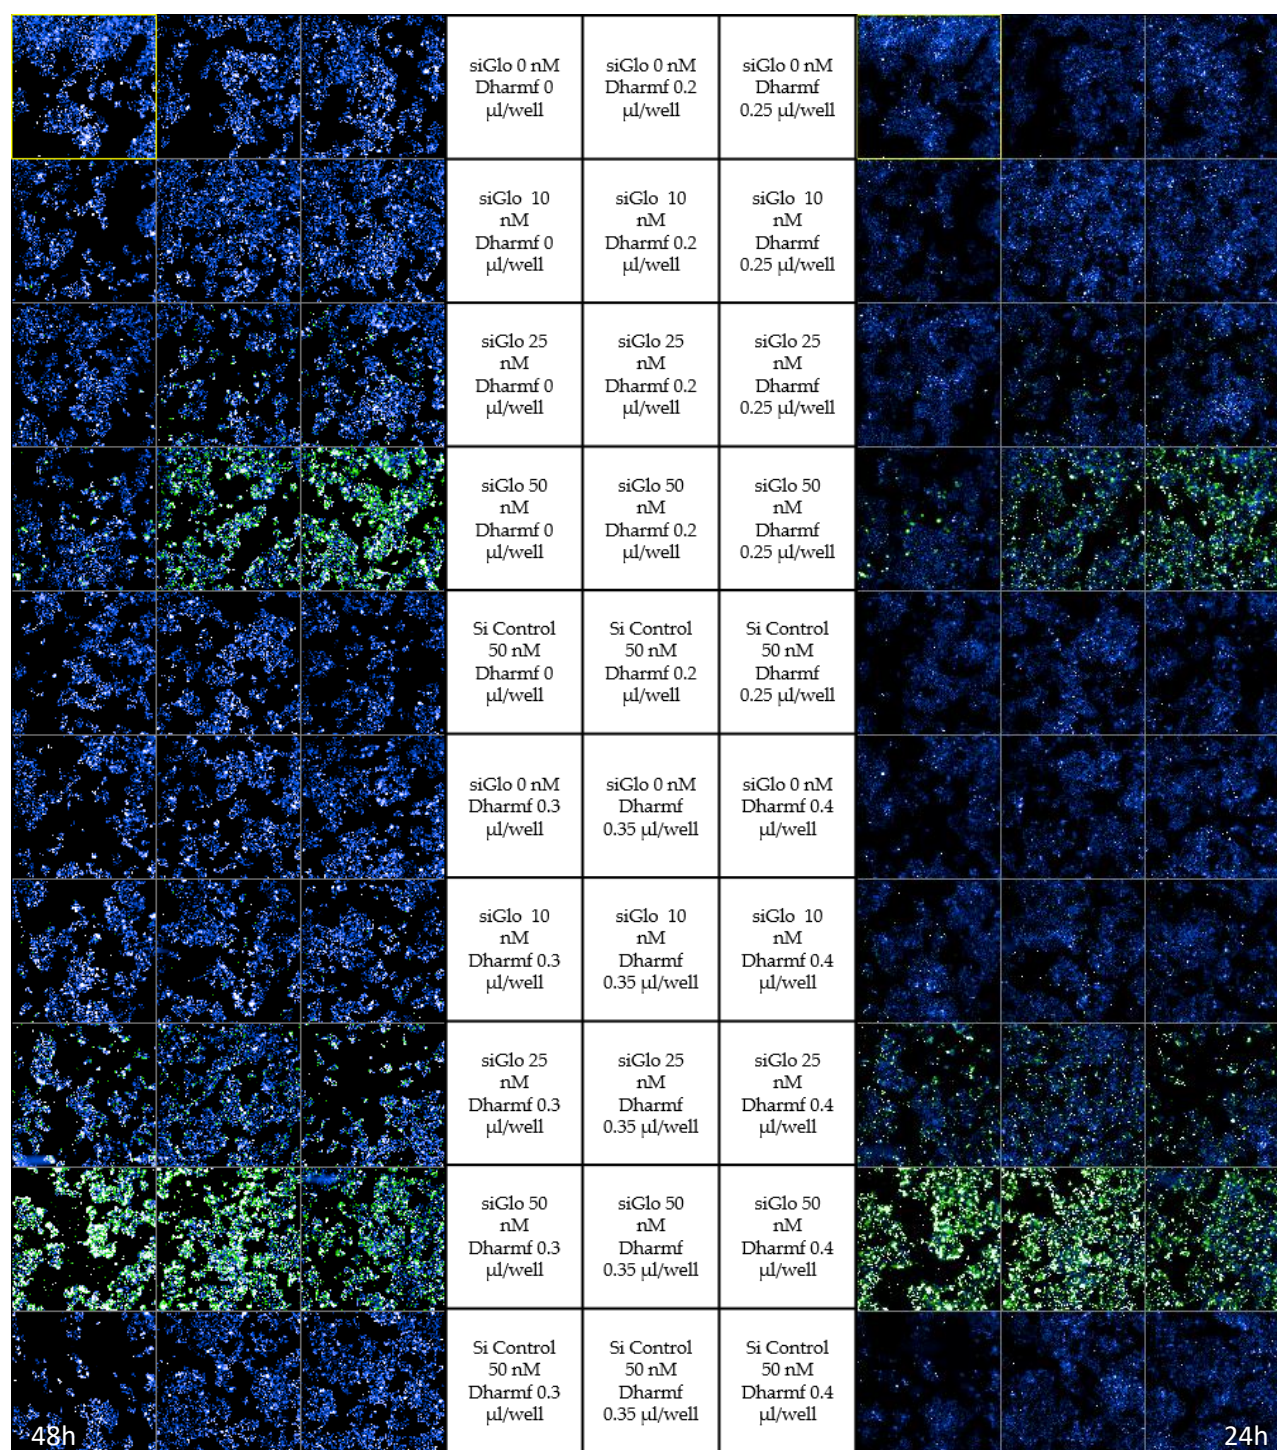

**Figure S3: Efficiency tests for automated siRNA approach.** Confocal fluorescence microscopy images of cells transfected with siGLO and non-fluorescent siControl at different concentrations, time of incubation. Different concentrations for the transfectant reagents is also shown.

Delannoy et al. Figure S4

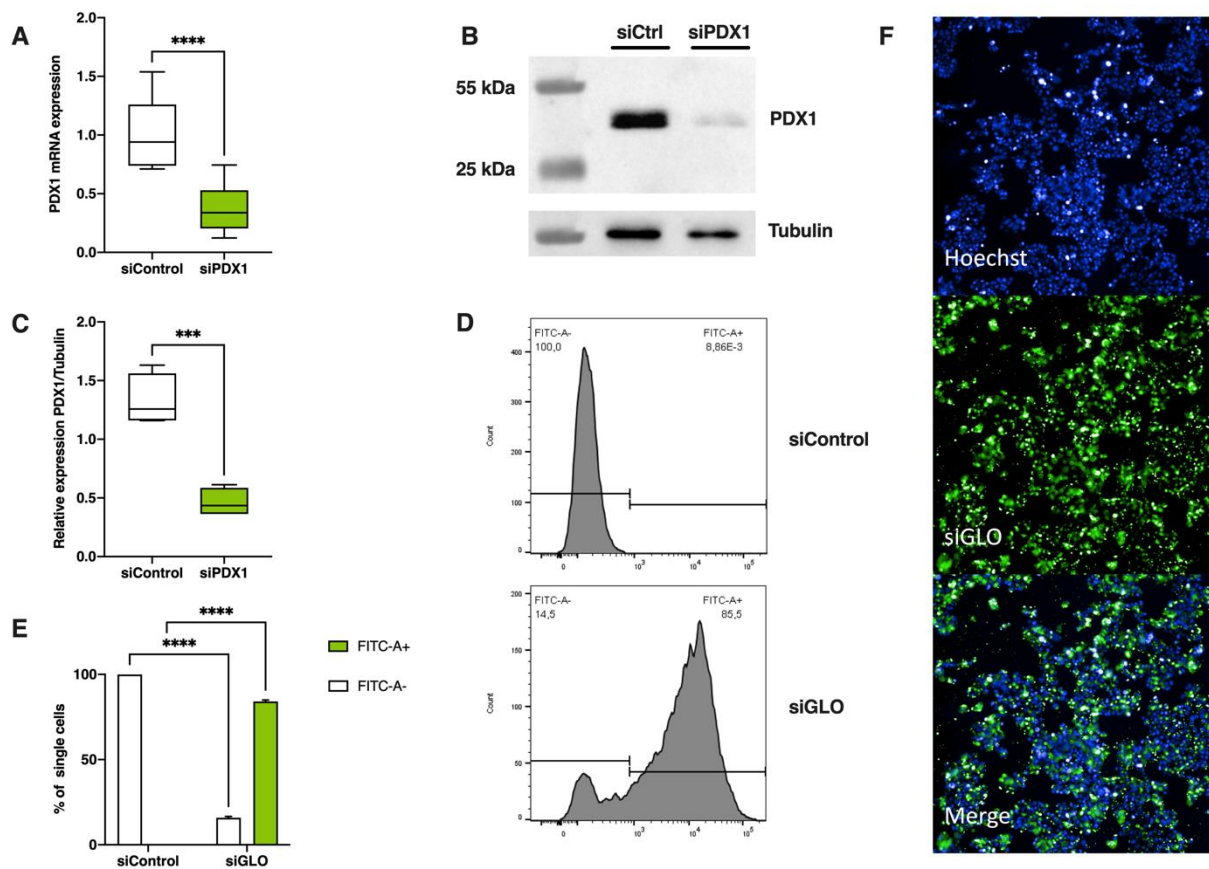

**Figure S4: Efficiency of automated transfection of Min6 cells.** (A) PDX1 mRNA expression from siCtrl and siPDX1 Min6 cells after automated reverse transfection; (B, C) Western blot showing mouse PDX1 protein level in Min6 cells after automated reverse transfection with siRNA control and siPDX1; (D) Histogram and (E) graphical representation of the number of FITC-A- and FITC-A + cells after transfection with siGLO. (F) Confocal fluorescence microscopy images of cells transfected with siGLO. Two-way ANOVA with Bonferroni posttest analyses. Error bars are  $\pm$  SEM and  $n=3$ . \*\*\*  $p<0.001$ ; \*\*\*\*  $p<0.0001$ .



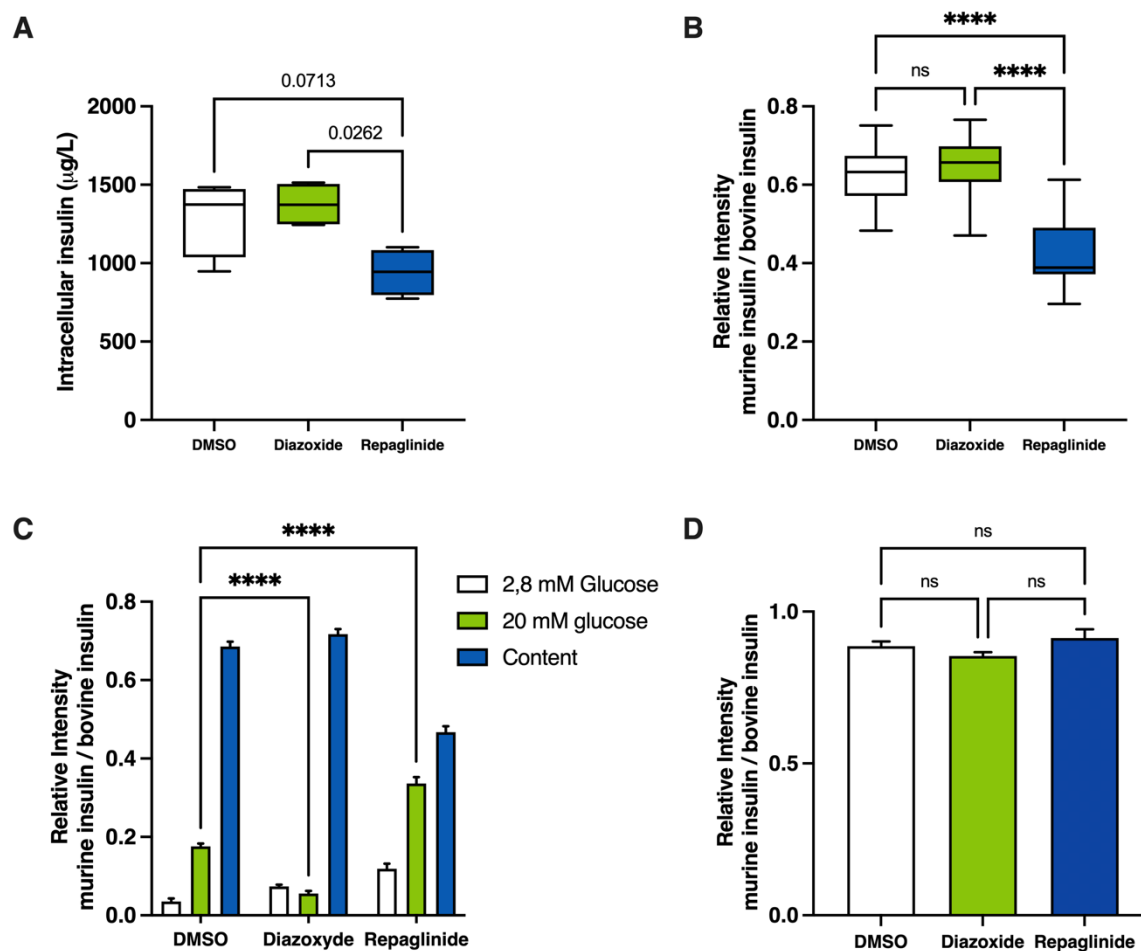

**Figure S5: Insulin secretion analysis of Min6 cells treated with diazoxide and repaglinide by MALDI-TOF mass spectrometry.** Quantification of insulin intracellular content of Min6 cells treated with DMSO, diazoxide 100 $\mu\text{M}$  and repaglinide 100nM by ELISA assay (A) and MALDI-TOF mass spectrometry (B, C). (D) Total insulin stored and secreted in min6 cells treated with DMSO, diazoxide 100 $\mu\text{M}$  and repaglinide 100nM measured through MALDI-TOF mass spectrometry. Two-way ANOVA with Bonferroni posttest analyses. Error bars are  $\pm$  SEM and  $n=4$  for ELISA,  $n=32$  for MS. \*\*\*\*  $p<0.0001$

Delannoy et al. Figure S6

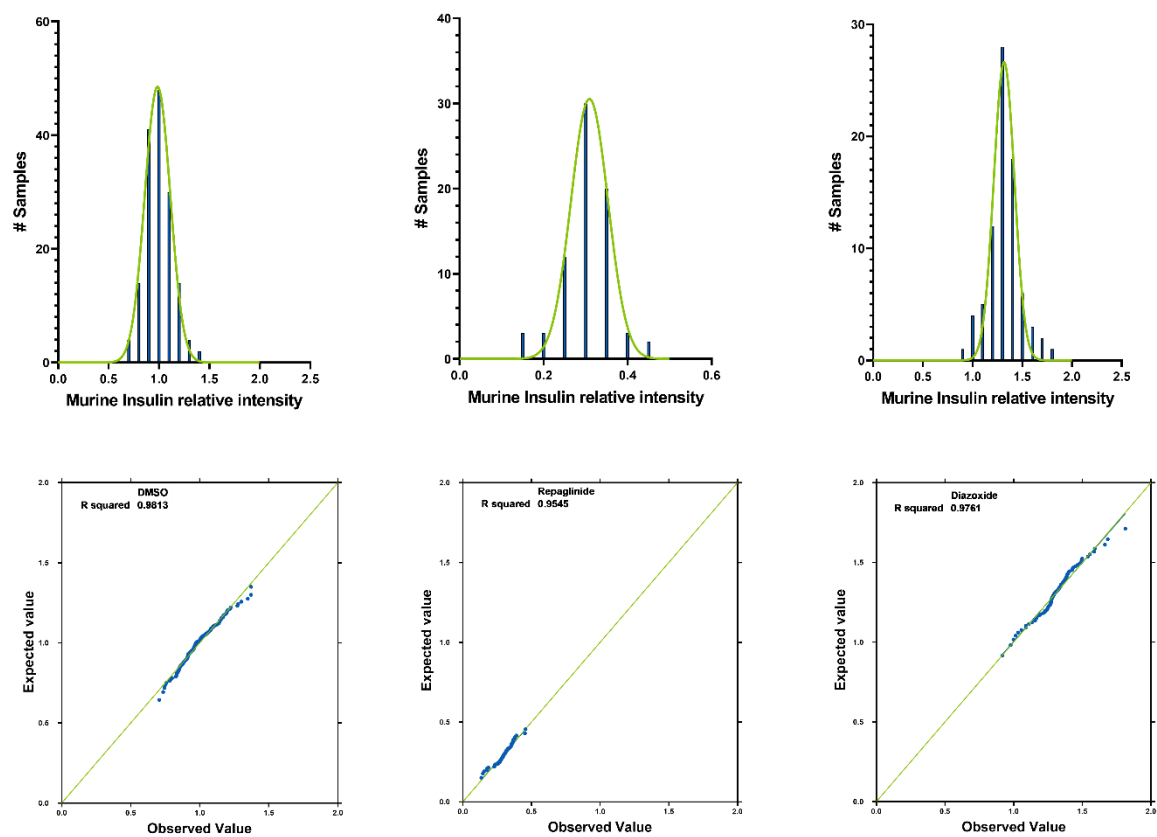

**Figure S6: Normal distribution of analysis of intracellular insulin content from Min6 cells treated with DMSO, repaglinide and diazoxide.** Histograms representing frequency distribution for murine insulin relative intensity (Upper panel). Simple linear regression of Normality and Lognormality Tests of Normality for murine insulin relative intensity (Lower panel). n=160 for DMSO and n=80 for Repaglinide and Diazoxide.



Delannoy et al. Figure S7

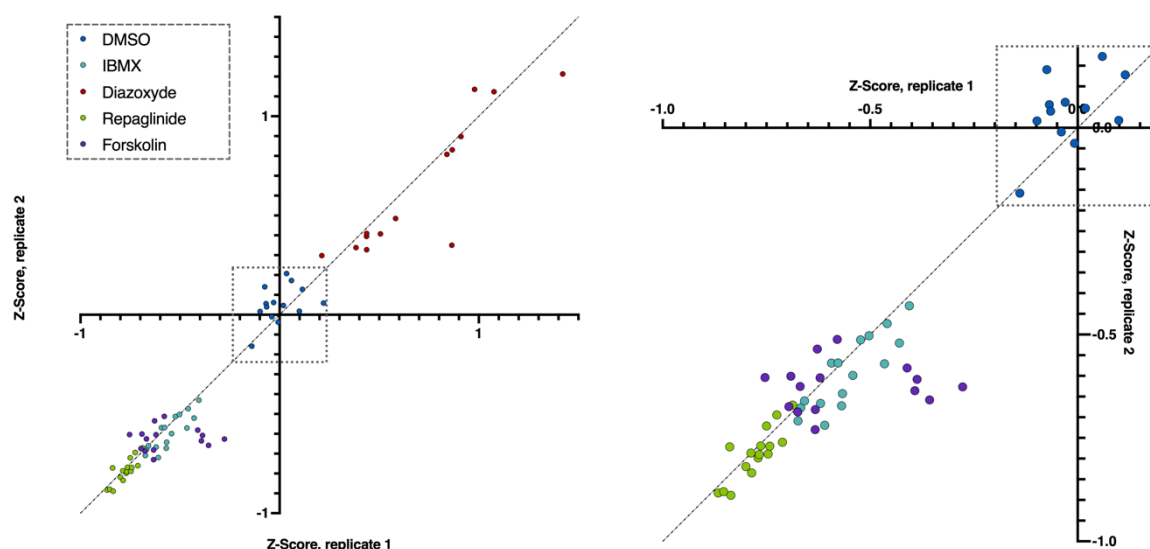

**Figure S7: High-throughput analysis of intracellular insulin content of min6 cells treated with DMSO, IBMX, diazoxide, repaglinide and forskolin after glucose-stimulated insulin secretion.**

Min6 cells were treated with three bioactives molecules known to induce insulin secretion, repaglinide (green), IBMX (light blue) and Forskolin (purple) whereas diazoxide (red) was used as an inhibitor of insulin secretion
